# Supplementary material
Source: PubMed Central journal article supplement (PMC6302330)
Supplement: CJN.05390518SupplementaryData.pdf [file CJN.05390518SupplementaryData.pdf]

**ONLINE SUPPLEMENT**

| <b>Supplemental Table 1. Baseline Characteristics of SPRINT participants with CKD by Serum Fibroblast Growth Factor 23 Quartiles</b> |                 |                 |                 |                 |
|--------------------------------------------------------------------------------------------------------------------------------------|-----------------|-----------------|-----------------|-----------------|
|                                                                                                                                      | <b>FGF23 Q1</b> | <b>FGF23 Q2</b> | <b>FGF23 Q3</b> | <b>FGF23 Q4</b> |
|                                                                                                                                      | n= 621          | <b>n=622</b>    | n=622           | n=621           |
| <b>FGF23 range (pg/ml)</b>                                                                                                           | 12.7-51.9       | 52.0-66.4       | 66.5-87.6       | 87.7-1687       |
| Age (years) ± SD                                                                                                                     | 73 (9)          | 74 (8)          | 73 (9)          | 73 (10)         |
| Male, n (%)                                                                                                                          | 389 (62.7)      | 392 (63.0)      | 363 (58.4)      | 343 (55.2)      |
| Race, n (%)                                                                                                                          |                 |                 |                 |                 |
| White                                                                                                                                | 418 (67.3)      | 478 (76.9)      | 442 (71.1)      | 435 (70.1)      |
| Black                                                                                                                                | 184 (29.6)      | 130 (20.9)      | 160 (25.7)      | 175 (28.2)      |
| Other                                                                                                                                | 19 (3.1)        | 14 (2.3)        | 20 (3.2)        | 11 (1.8)        |
| SPRINT CCN                                                                                                                           |                 |                 |                 |                 |
| Utah                                                                                                                                 | 177 (28.5)      | 182 (29.3)      | 207 (33.3)      | 212 (34.1)      |
| Ohio (Case Western)                                                                                                                  | 94 (15.1)       | 87 (14.0)       | 95 (15.3)       | 99 (15.9)       |
| Southeast (Wake)                                                                                                                     | 122 (19.7)      | 111 (17.9)      | 103 (16.6)      | 115 (18.5)      |
| South (Alabama)                                                                                                                      | 103 (16.6)      | 119 (19.1)      | 94 (15.1)       | 78 (12.6)       |
| Veterans Affairs                                                                                                                     | 125 (20.1)      | 123 (19.8)      | 123 (19.8)      | 117 (18.8)      |
| Prevalent Cardiovascular Disease, n (%)                                                                                              | 142 (22.9)      | 161 (25.9)      | 164 (26.4)      | 158 (25.4)      |
| Prevalent Heart Failure, n (%)                                                                                                       | 36 (5.8)        | 35 (5.6)        | 32 (5.1)        | 51 (8.3)        |
| eGFR (ml/min/1.73m <sup>2</sup> ) ± SD                                                                                               | 50 (8)          | 49 (8)          | 46 (9)          | 39 (12)         |
| eGFR Categories, n (%)                                                                                                               |                 |                 |                 |                 |
| 45-59 ml/min/1.73m <sup>2</sup>                                                                                                      | 474 (76.3)      | 441 (70.9)      | 352 (56.6)      | 204 (32.9)      |
| 30-44 ml/min/1.73m <sup>2</sup>                                                                                                      | 131 (21.1)      | 168 (27.0)      | 231 (37.1)      | 245 (39.45)     |
| < 30 ml/min/1.73m <sup>2</sup>                                                                                                       | 16 (2.6)        | 13 (2.1)        | 39 (6.3)        | 172 (27.7)      |
| Urine Albumin/Creatinine, Median [IQR]                                                                                               | 13 [7-37]       | 12 [6-33]       | 17 [7-59]       | 24 [10-99]      |
| Urine Albumin/Creatinine > 30 mg/g, n (%)                                                                                            | 176 (29)        | 162 (27)        | 221 (36)        | 269 (44)        |
| Systolic BP (mm Hg) ± SD                                                                                                             | 141 (17)        | 140 (16)        | 139 (17)        | 139 (17)        |
| Diastolic BP (mm Hg) ± SD                                                                                                            | 76 (13)         | 75 (12)         | 74 (13)         | 73 (13)         |

Supplemental material is neither peer-reviewed nor thoroughly edited by CJASN. The authors alone are responsible for the accuracy and presentation of the material.

| # of Antihypertensives                    | 2.0        | 2.1        | 2.2        | 2.3        |
|-------------------------------------------|------------|------------|------------|------------|
| Smoking, n (%)                            |            |            |            |            |
| Current                                   | 85 (13.7)  | 39 (6.3)   | 43 (6.9)   | 52 (8.4)   |
| Former                                    | 270 (43.5) | 288 (46.3) | 294 (47.3) | 285 (45.9) |
| Never                                     | 266 (42.8) | 295 (47.4) | 295 (45.8) | 284 (45.7) |
| Body mass index (kg/m <sup>2</sup> ) ± SD | 29.2 (5.9) | 29.2 (5.2) | 30.0 (6.0) | 29.7 (6.4) |
| Total cholesterol (mg/dl) ± SD            | 181 (40)   | 184 (40)   | 184 (41)   | 186 (42)   |
| HDL cholesterol (mg/dl) ± SD              | 53 (15)    | 52 (14)    | 52 (14)    | 53 (15)    |
| Calcium (mg/dl) ± SD                      | 9.5 (0.4)  | 9.6 (0.5)  | 9.6 (0.5)  | 9.7 (0.5)  |
| Phosphate (mg/dl) ± SD                    | 3.4 (0.5)  | 3.5 (0.5)  | 3.6 (0.5)  | 3.7 (0.6)  |
| Parathyroid hormone (pg/ml), median [IQR] | 46 [34-61] | 44 [34-59] | 48 [36-67] | 55 [37-83] |

**Supplemental Table 2. Association of Serum PTH with Cardiovascular Composite Endpoints in SPRINT Participants with CKD**

|                      | PTH Q1             | PTH Q2             | PTH Q3             | PTH Q4             | Per Doubling of PTH | P Value | P-Interaction* |
|----------------------|--------------------|--------------------|--------------------|--------------------|---------------------|---------|----------------|
| <b>Range (pg/ml)</b> | 4-35               | 36-48              | 49-67              | 68-409             |                     |         |                |
|                      | <b>HR (95% CI)</b>  |         |                |
| <b>MI</b>            |                    |                    |                    |                    |                     |         |                |
| Model 1              | Reference          | 0.78 (0.42, 1.50)  | 1.00 (0.54, 1.87)  | 1.63 (0.92, 2.89)  | 1.49 (1.11, 2.03)   | 0.009   |                |
| Model 2              | Reference          | 0.74 (0.39, 1.45)  | 0.85 (0.43, 1.67)  | 1.43 (0.77, 2.67)  | 1.41 (1.01, 1.99)   | 0.05    | 0.64           |
| <b>Non MI ACS</b>    |                    |                    |                    |                    |                     |         |                |
| Model 1              | Reference          | 0.37 (0.09, 1.38)  | 1.40 (0.55, 3.56)  | 1.07 (0.39, 3.01)  | 1.37 (0.80, 2.35)   | 0.25    |                |
| Model 2              | Reference          | 0.35 (0.09, 1.35)  | 1.28 (0.48, 3.39)  | 0.73 (0.22, 2.43)  | 1.17 (0.63, 2.16)   | 0.61    | 0.76           |
| <b>Stroke</b>        |                    |                    |                    |                    |                     |         |                |
| Model 1              | Reference          | 1.69 (0.74, 3.83)  | 1.86 (0.80, 4.26)  | 2.49 (1.11, 5.53)  | 1.63 (1.13, 2.33)   | 0.008   |                |
| Model 2              | Reference          | 1.63 (0.69, 3.87)  | 1.82 (0.76, 4.34)  | 1.97 (0.81, 4.76)  | 1.45 (0.97, 2.16)   | 0.07    | 0.9            |
| <b>CVD Death</b>     |                    |                    |                    |                    |                     |         |                |
| Model 1              | Reference          | 1.13 (0.44, 2.87)  | 1.48 (0.59, 3.70)  | 2.83 (1.23, 6.49)  | 1.94 (1.31, 2.87)   | 0.001   |                |
| Model 2              | Reference          | 0.69 (0.24, 1.92)  | 1.00 (0.39, 2.55)  | 1.337 (0.57, 3.33) | 1.29 (0.84, 1.97)   | 0.24    | 0.49           |

Model 1: Adjusted for age, gender, race, and randomized treatment arm

Model 2: Adjusted for Model 1 variables plus eGFR-Creatinine-Cystatin C, urine albumin-creatinine ratio, prevalent cardiovascular disease, prevalent heart failure, systolic blood pressure, # antihypertensives at baseline, smoking, body mass index, Total cholesterol and HDL cholesterol

\* P-interaction for interaction between serum PTH and treatment arm.

**Supplemental Table 3. Effects of Randomization to the Intensive vs. Standard BP arms, Stratified by Serum Fibroblast Growth Factor 23 Levels Above vs. Below the Median in CKD Participants in SPRINT\***

|                              | Standard             |             | Intensive            |                   | P-Interaction** |
|------------------------------|----------------------|-------------|----------------------|-------------------|-----------------|
|                              | # Events / # At Risk | HR (95% CI) | # Events / # At Risk | HR (95% CI)       |                 |
| <b>Cardiovascular Events</b> |                      |             |                      |                   | 0.48            |
| ≤ Median                     | 64/564               | Reference   | 56/628               | 0.81 (0.56, 1.18) |                 |
| > Median                     | 77/605               | Reference   | 64/585               | 0.88 (0.62, 1.25) |                 |
| <b>Heart Failure</b>         |                      |             |                      |                   | 0.06            |
| ≤ Median                     | 20/564               | Reference   | 16/628               | 0.74 (0.37, 1.48) |                 |
| > Median                     | 39/605               | Reference   | 27/585               | 0.66 (0.39, 1.12) |                 |

\*Models adjusted for age, gender, race, eGFR-Creatinine-Cystatin C, and urine albumin-creatinine ratio,

prevalent cardiovascular disease, prevalent heart failure, systolic blood pressure, # antihypertensives at

baseline, smoking, body mass index, Total cholesterol and HDL cholesterol

\*\* Interaction p-value evaluating parathyroid hormone as a continuous variable.

**Supplemental Table 4. Association of Serum Fibroblast Growth Factor 23 with Cardiovascular Composite Endpoints in SPRINT Participants with CKD**

|                      | <b>FGF23 Q1</b>    | <b>FGF23 Q2</b>    | <b>FGF23 Q3</b>    | <b>FGF23 Q4</b>    | <b>Per Doubling of FGF</b> | <b>P Value</b> | <b>P Int*</b> |
|----------------------|--------------------|--------------------|--------------------|--------------------|----------------------------|----------------|---------------|
| <b>Range (pg/ml)</b> | 13-52              | 52-66              | 67-88              | 88-1687            |                            |                |               |
|                      | <b>HR (95% CI)</b>         |                |               |
| <b>MI</b>            |                    |                    |                    |                    |                            |                |               |
| Model 1              | Reference          | 1.01 (0.53, 1.94)  | 1.34 (0.73, 2.48)  | 1.50 (0.72, 2.48)  | 1.32 (0.96, 1.82)          | 0.09           |               |
| Model 2              | Reference          | 1.15 (0.57, 2.31)  | 1.29 (0.66, 2.53)  | 1.34 (0.65, 2.78)  | 1.15 (0.78, 1.69)          | 0.48           | 0.32          |
| <b>Non MI ACS</b>    |                    |                    |                    |                    |                            |                |               |
| Model 1              | Reference          | 1.12 (0.37, 3.34)  | 1.49 (0.53, 4.19)  | 1.08 (0.35, 3.37)  | 0.93 (0.50, 1.75)          | 0.84           |               |
| Model 2              | Reference          | 1.35 (0.38, 4.86)  | 2.15 (0.64, 7.21)  | 1.74 (0.44, 6.88)  | 1.33 (0.63, 2.82)          | 0.45           | 0.79          |
| <b>Stroke</b>        |                    |                    |                    |                    |                            |                |               |
| Model 1              | Reference          | 1.22 (0.59, 2.55)  | 0.95 (0.43, 2.09)  | 1.59 (0.78, 3.22)  | 1.37 (0.93, 2.00)          | 0.11           |               |
| Model 2              | Reference          | 1.39 (0.63, 3.03)  | 0.98 (0.41, 2.28)  | 1.34 (0.57, 3.14)  | 1.23 (0.79, 1.94)          | 0.35           | 0.43          |
| <b>CVD Death</b>     |                    |                    |                    |                    |                            |                |               |
| Model 1              | Reference          | 0.89 (0.36, 2.20)  | 1.24 (0.54, 2.93)  | 2.12 (0.98, 4.59)  | 1.69 (1.16, 2.45)          | 0.006          |               |
| Model 2              | Reference          | 0.90 (0.35, 2.31)  | 0.78 (0.31, 1.97)  | 0.82 (0.32, 2.10)  | 0.97 (0.57, 1.65)          | 0.92           | 0.5           |

Model 1: Adjusted for age, gender, race, and randomized treatment arm

Model 2: Adjusted for Model 1 variables plus eGFR-Creatinine-Cystatin C, urine albumin-creatinine ratio, prevalent cardiovascular disease, prevalent heart failure, systolic blood pressure, # antihypertensives at baseline, smoking, body mass index, Total cholesterol and HDL cholesterol

\* P-interaction for interaction between serum PTH and treatment arm.

**Supplemental Table 5. Association of Serum PTH/FePhos with Cardiovascular Events, Heart Failure Events, and Mortality in SPRINT Participants with CKD**

| Range (pg/ml)                | PTH/FePhos Q1<br>0.23-1.93 | PTH/FePhos Q2<br>1.93-2.80 | PTH/FePhos Q3<br>2.80-4.19 | PTH/FePhos Q4<br>4.19-67.4 | P<br>Value | Per Doubling of<br>PTH/FePhos<br>HR (95% CI) | P<br>Value |
|------------------------------|----------------------------|----------------------------|----------------------------|----------------------------|------------|----------------------------------------------|------------|
| <b>Cardiovascular Events</b> |                            |                            |                            |                            |            |                                              |            |
| # Events/ # At Risk (%)      | 51/528 (9.7%)              | 61/515 (11.8%)             | 59/496 (11.9%)             | 47/488 (9.6%)              |            |                                              |            |
| Model 1                      | Reference                  | 1.31 (0.89, 1.93)          | 1.44 (0.97, 2.15)          | 1.24 (0.80, 1.93)          | 0.53       | 1.11 (0.94, 1.31)                            | 0.24       |
| Model 2                      | Reference                  | 1.32 (0.89, 1.96)          | 1.50 (1.00, 2.27)          | 1.18 (0.75, 1.85)          | 0.23       | 1.10 (0.93, 1.300)                           | 0.25       |
| <b>Heart Failure</b>         |                            |                            |                            |                            |            |                                              |            |
| # Events/ # At Risk (%)      | 19/528 (3.6%)              | 21/515 (4.1%)              | 25/496 (5.0%)              | 24/488 (4.9%)              |            |                                              |            |
| Model 1                      | Reference                  | 1.04 (0.54, 2.00)          | 1.25 (0.66, 2.38)          | 1.23 (0.62, 2.43)          | 0.88       | 1.04 (0.80, 1.36)                            | 0.75       |
| Model 2                      | Reference                  | 0.96 (0.49, 1.89)          | 1.21 (0.62, 2.38)          | 1.06 (0.52, 2.17)          | 0.91       | 1.02 (0.78, 1.33)                            | 0.89       |
| <b>All-Cause Mortality</b>   |                            |                            |                            |                            |            |                                              |            |
| # Events/ # At Risk (%)      | 36/528 (6.8%)              | 35/515 (6.8%)              | 44/496 (8.9%)              | 37/488 (7.6%)              |            |                                              |            |
| Model 1                      | Reference                  | 1.16 (0.71, 1.89)          | 1.47 (0.92, 2.35)          | 1.27 (0.75, 2.13)          | 0.45       | 1.13 (0.92, 1.38)                            | 0.25       |
| Model 2                      | Reference                  | 1.17 (0.71, 1.92)          | 1.44 (0.89, 2.33)          | 1.22 (0.71, 2.08)          | 0.54       | 1.11 (0.91, 1.36)                            | 0.32       |

Model 1: Adjusted for age, gender, race, and randomized treatment arm

Model 2: Adjusted for Model 1 variables plus eGFR-Creatinine-Cystatin C, urine albumin-creatinine ratio, prevalent cardiovascular disease, prevalent heart failure, systolic blood pressure, # antihypertensives at baseline, smoking, body mass index, Total cholesterol and HDL cholesterol

**Supplemental Table 6. Association of iPTH/FeCa with CVD Events, HF Events, and Mortality in SPRINT Participants with CKD**

| <b>Range (pg/ml)</b>         | <b>PTH/FeCa Q1<br/>3.59-43.8</b> | <b>PTH/FeCa Q2<br/>43.8-99.9</b> | <b>PTH/FeCa Q3<br/>99.9-242.6</b> | <b>PTH/FeCa Q4<br/>242.6-2746</b> | <b>P<br/>Value</b> | <b>Per Doubling of<br/>PTH/FeCa<br/>HR (95% CI)</b> | <b>P<br/>Value</b> |
|------------------------------|----------------------------------|----------------------------------|-----------------------------------|-----------------------------------|--------------------|-----------------------------------------------------|--------------------|
| <b>Cardiovascular Events</b> |                                  |                                  |                                   |                                   |                    |                                                     |                    |
| # Events/ # At Risk (%)      | 50/487 (10.3%)                   | 48/494 (9.7%)                    | 54/514 (10.5%)                    | 66/532 (12.4%)                    |                    |                                                     |                    |
| Model 1                      | Reference                        | 0.99 (0.65, 1.49)                | 1.18 (0.79, 1.77)                 | 1.47 (0.99, 2.19)                 | 0.16               | 1.07 (0.99, 1.64)                                   | 0.11               |
| Model 2                      | Reference                        | 0.97 (0.64, 1.49)                | 1.17 (0.77, 1.78)                 | 1.27 (0.84, 1.92)                 | 0.55               | 1.04 (0.95, 1.13)                                   | 0.37               |
| <b>Heart Failure</b>         |                                  |                                  |                                   |                                   |                    |                                                     |                    |
| # Events/ # At Risk (%)      | 21/487 (4.3%)                    | 14/494 (2.8%)                    | 23/514 (4.5%)                     | 31/532 (5.8%)                     |                    |                                                     |                    |
| Model 1                      | Reference                        | 0.70 (0.34, 1.42)                | 1.25 (0.67, 2.36)                 | 1.49 (0.81, 2.77)                 | 0.14               | 1.11 (0.98, 1.26)                                   | 0.11               |
| Model 2                      | Reference                        | 0.71 (0.33, 1.47)                | 1.26 (0.64, 2.49)                 | 1.19 (0.62, 2.33)                 | 0.39               | 1.05 (0.92, 1.20)                                   | 0.47               |
| <b>All-Cause Mortality</b>   |                                  |                                  |                                   |                                   |                    |                                                     |                    |
| # Events/ # At Risk (%)      | 32/487 (6.6%)                    | 38/494 (7.7%)                    | 33/514 (6.4%)                     | 49/532 (9.2%)                     |                    |                                                     |                    |
| Model 1                      | Reference                        | 1.24 (0.76, 2.04)                | 1.12 (0.67, 1.88)                 | 1.36 (0.84, 2.23)                 | 0.63               | 1.04 (0.94, 1.15)                                   | 0.42               |
| Model 2                      | Reference                        | 1.22 (0.74, 2.04)                | 1.06 (0.63, 1.81)                 | 1.10 (0.66, 1.83)                 | 0.89               | 1.00 (0.90, 1.11)                                   | 0.98               |

Model 1: Adjusted for age, gender, race, and randomized treatment arm

Model 2: Adjusted for Model 1 variables plus eGFR-Creatinine-Cystatin C, urine albumin-creatinine ratio, prevalent cardiovascular disease, prevalent heart failure, systolic blood pressure, # antihypertensives at baseline, smoking, body mass index, Total cholesterol and HDL cholesterol

**Supplemental Table 7. Association of FGF-23/FePhos with CVD Events, HF Events, and Mortality in SPRINT Participants with CKD**

| Range (pg/ml)                | FGF23/FePhos<br>Q1 | FGF23/FePhos<br>Q2 | FGF23/FePhos<br>Q3 | FGF23/FePhos<br>Q4 | P<br>Value | Per Doubling of             |            |
|------------------------------|--------------------|--------------------|--------------------|--------------------|------------|-----------------------------|------------|
|                              | 0.23-2.83          | 2.83-3.93          | 3.93-5.49          | 5.49-155.1         |            | FGF23/FePhos<br>HR (95% CI) | P<br>Value |
|                              | HR (95% CI)        | HR (95% CI)        | HR (95% CI)        | HR (95% CI)        |            |                             |            |
| <b>Cardiovascular Events</b> |                    |                    |                    |                    |            |                             |            |
| # Events/ # At Risk (%)      | 59/519 (27.1%)     | 70/514 (32.1%)     | 50/521 (9.6%)      | 39/472 (8.3%)      |            |                             |            |
| Model 1                      | Reference          | 1.17 (0.82, 1.69)  | 0.91 (0.61, 1.35)  | 0.85 (0.55, 1.32)  | 0.42       | 0.91 (0.76, 1.09)           | 0.31       |
| Model 2                      | Reference          | 1.04 (0.72, 1.51)  | 0.88 (0.58, 1.31)  | 0.84 (0.53, 1.31)  | 0.72       | 0.90 (0.74, 1.08)           | 0.25       |
| <b>Heart Failure</b>         |                    |                    |                    |                    |            |                             |            |
| # Events/ # At Risk (%)      | 24/519 (4.6%)      | 30/514 (5.8%)      | 21/521 (4.0%)      | 14/472 (3.0%)      |            |                             |            |
| Model 1                      | Reference          | 1.24 (0.71, 2.21)  | 0.88 (0.47, 1.64)  | 0.59 (0.28, 1.20)  | 0.17       | 0.73 (0.55, 0.97)           | 0.03       |
| Model 2                      | Reference          | 1.05 (0.59, 1.91)  | 0.74 (0.38, 1.44)  | 0.58 (0.27, 1.20)  | 0.32       | 0.70 (0.52, 0.95)           | 0.02       |
| <b>All-Cause Mortality</b>   |                    |                    |                    |                    |            |                             |            |
| # Events/ # At Risk (%)      | 41/519 (7.9%)      | 37/514 (7.2%)      | 44/521 (8.5%)      | 30/472 (6.4%)      |            |                             |            |
| Model 1                      | Reference          | 0.87 (0.55, 1.38)  | 1.17 (0.75, 1.84)  | 1.02 (0.60, 1.70)  | 0.64       | 1.11 (0.89, 1.38)           | 0.35       |
| Model 2                      | Reference          | 0.72 (0.45, 1.16)  | 1.13 (0.71, 1.79)  | 0.88 (0.52, 1.48)  | 0.29       | 1.05 (0.84, 1.31)           | 0.67       |

Model 1: Adjusted for age, gender, race, and randomized treatment arm

Model 2: Adjusted for Model 1 variables plus eGFR-Creatinine-Cystatin C, urine albumin-creatinine ratio, prevalent cardiovascular disease, prevalent heart failure, systolic blood pressure, # antihypertensives at baseline, smoking, body mass index, Total cholesterol and HDL cholesterol



**Supplemental Table 8. Association of Parathyroid Hormone and Fibroblast Growth Factor 23 with Serious Adverse Events in SPRINT Participants with CKD**

|                           | PTH≤ Median | PTH>Median | FGF23≤ Median | FGF23>Median |
|---------------------------|-------------|------------|---------------|--------------|
| <b>Any SAE, n (%)</b>     | 629 (49)    | 648 (53)   | 591 (48)      | 686 (54)     |
| <b>Hypotension, n (%)</b> | 35 (3)      | 47 (4)     | 37 (3)        | 45 (4)       |
| <b>AKI, n (%)</b>         | 78 (6)      | 124 (10)   | 86 (7)        | 116 (9)      |
| <b>Syncope, n (%)</b>     | 44 (3)      | 30 (2)     | 41 (3)        | 33 (3)       |
| <b>Fall, n (%)</b>        | 62 (5)      | 45 (4)     | 39 (3)        | 68 (5)       |
| <b>Electrolyte, n (%)</b> | 57 (4)      | 55 (4)     | 50 (4)        | 62 (5)       |
| <b>Bradycardia, n (%)</b> | 41 (3)      | 42(3)      | 30 (2)        | 53 (4)       |
